# Supplementary material for: Photochemically driven intercalation of small molecules into DNA by in situ irradiation
Source: Royal Society of Chemistry journal article supplement (doi:10.1039/c002748k), 2010-01-01
Supplement: c002748k.pdf [file c002748k.pdf]

## Photochemically driven intercalation of small molecules into DNA by *in situ* irradiation

Fausto Puntoriero, Maria Letizia Di Pietro, Fabien Tuyéras, Philippe Ochsenbein, Philippe P. Lainé and Sebastiano Campagna

### SUPPORTING INFORMATION

#### Characterization of compounds **1** and **2**

(including  $^1\text{H}$  and  $^{13}\text{C}$  NMR and mass spectra of **1** and **2** and X-ray - Ortep drawing - of **2**)

#### Materials and methods

#### Schematization of the photochemical process

#### Circular dichroism spectra

#### Comparison between absorption spectra

#### References

### Characterization

Characterization of compounds **1** and **2** (for convenience, the structural formulae of the compounds and numbering schemes are also shown).

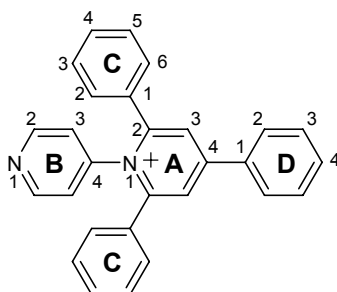

#### py-DPH<sub>2</sub>-Ph<sup>+</sup>, BF<sub>4</sub><sup>-</sup> (**1**)

$^1\text{H}$  NMR (500 MHz, CD<sub>3</sub>CN, 25°C):  $\delta$  8.43 (s, 2H, H<sup>A3</sup>), 8.41 (d,  $J = 6.0$  Hz, 2H, H<sup>B2</sup>), 8.12 (d,  $J = 8.0$  Hz, 2H, H<sup>D2</sup>), 7.73 (dd,  $J = 7.5, 7.0$  Hz, 1H, H<sup>D4</sup>), 7.67 (dd,  $J = 8.0, 7.0$  Hz, 2H, H<sup>D3</sup>), 7.47-7.37 (m, 10H, H<sup>C2, C3, C4, C5, C6</sup>), 7.25 (d,  $J = 5.5$  Hz, 2H, H<sup>B3</sup>);  $^{13}\text{C}$  NMR (126 MHz, CD<sub>3</sub>CN, 25°C):  $\delta$  158.5, 157.2, 152.0, 147.2, 134.6, 134.0, 133.3, 131.7, 130.9, 130.8, 129.7, 129.6, 127.0, 124.2; ESI-MS ( $m/z$ ): [M]<sup>+</sup> calcd. for C<sub>28</sub>H<sub>21</sub>N<sub>2</sub>, 385.17; found, 385.33; analysis (calcd., found for C<sub>28</sub>H<sub>21</sub>N<sub>2</sub>BF<sub>4</sub>): C (71.21, 71.17), H (4.48, 4.42), N (5.93, 5.99).

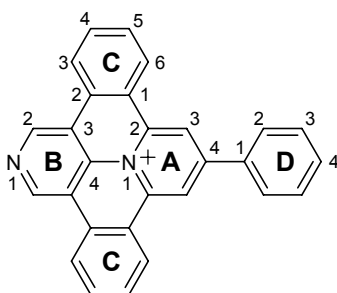

**dBQNTH<sub>2</sub>-Ph<sup>+</sup>,BF<sub>4</sub><sup>-</sup> (2)**

<sup>1</sup>H NMR (500 MHz, CD<sub>3</sub>CN, 25°C):  $\delta$  10.21 (s, 2H, H<sup>B2</sup>), 9.55 (s, 2H, H<sup>A3</sup>), 9.12 (d,  $J = 9.0$  Hz, 2H, H<sup>C6</sup>), 8.96 (d,  $J = 8.5$  Hz, 2H, H<sup>C3</sup>), 8.36-8.34 (m, 2H, H<sup>D2</sup>), 8.18 (dd,  $J = 8.0, 7.5$  Hz, 2H, H<sup>C4</sup>), 8.06 (dd,  $J = 8.5, 7.5$  Hz, 2H, H<sup>C5</sup>), 7.79-7.78 (m, 3H, H<sup>D3, D4</sup>); <sup>13</sup>C NMR (126 MHz, CD<sub>3</sub>CN, 25°C):  $\delta$  153.2, 146.2, 144.8, 135.7, 135.6, 133.3, 133.2, 132.4, 130.84, 130.78, 130.0, 128.3, 125.6, 124.2, 120.3, 119.3; ESI-MS ( $m/z$ ): [M]<sup>+</sup> calcd. for C<sub>28</sub>H<sub>17</sub>N<sub>2</sub>, 381.14; found, 381.40; analysis (calcd., found for C<sub>28</sub>H<sub>17</sub>N<sub>2</sub>BF<sub>4</sub>): C (71.82, 71.78), H (3.67, 3.47), N (5.98, 6.06).

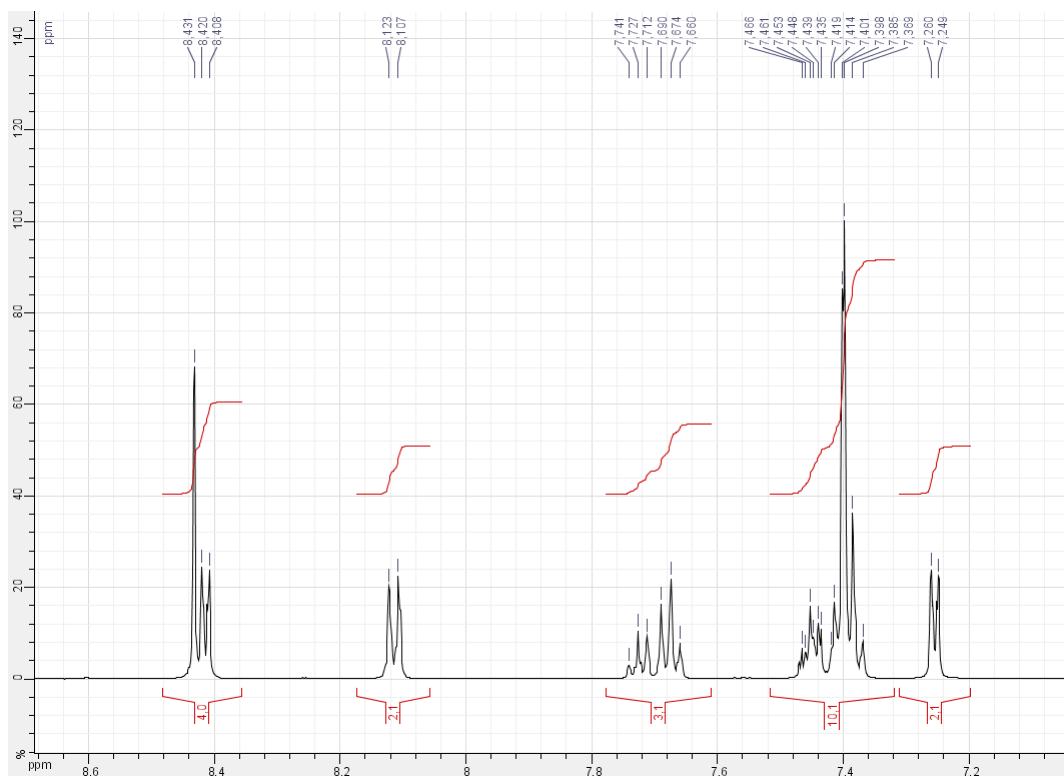

**Figure S1.** <sup>1</sup>H NMR spectrum of **1** in acetonitrile.

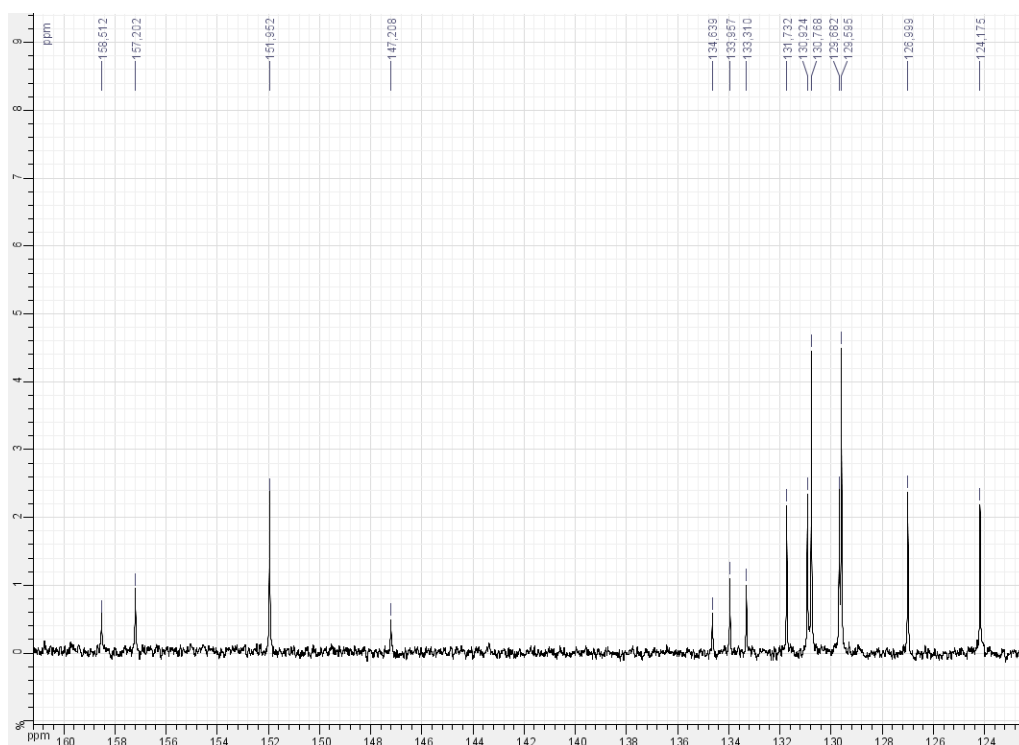

FIGURE S2.  $^{13}\text{C}$  NMR spectrum of **1** in acetonitrile.

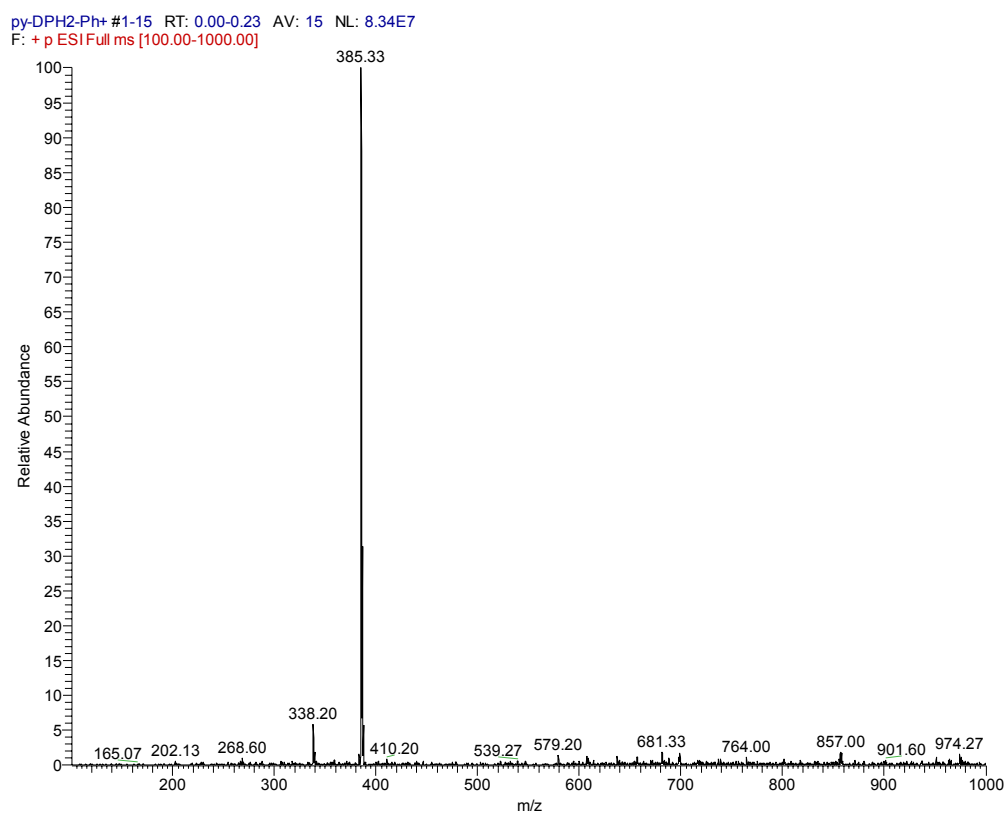

Figure S3. Mass spectrum of **1**.

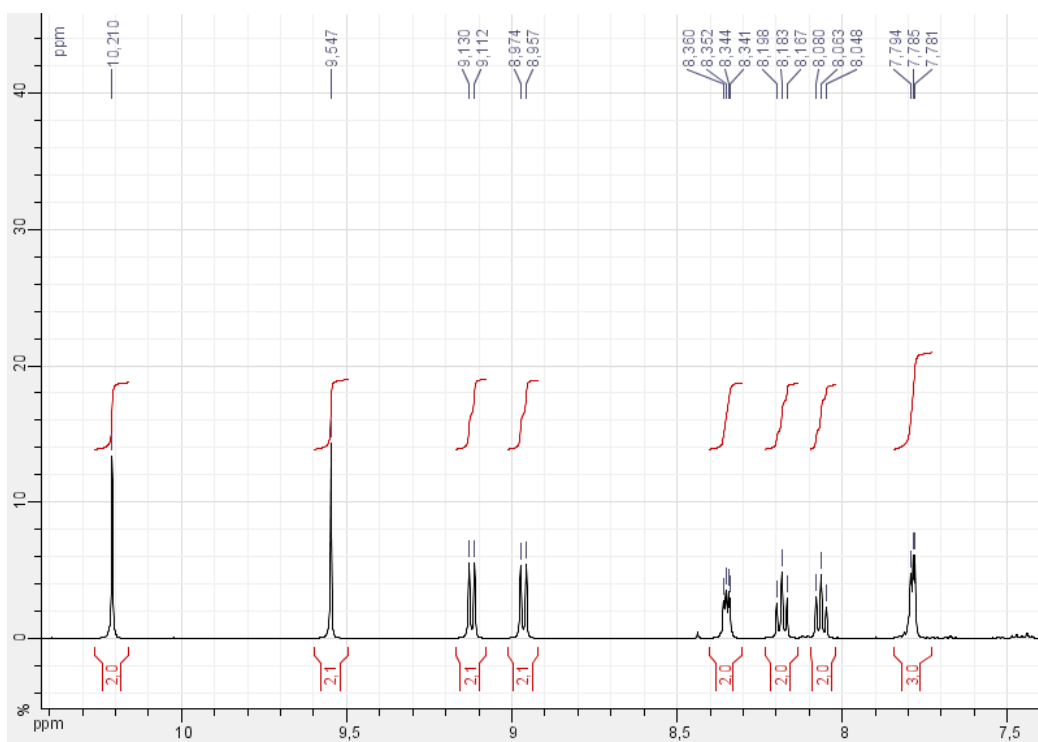

Figure S4.  $^1\text{H}$  NMR spectrum of **2** in acetonitrile.

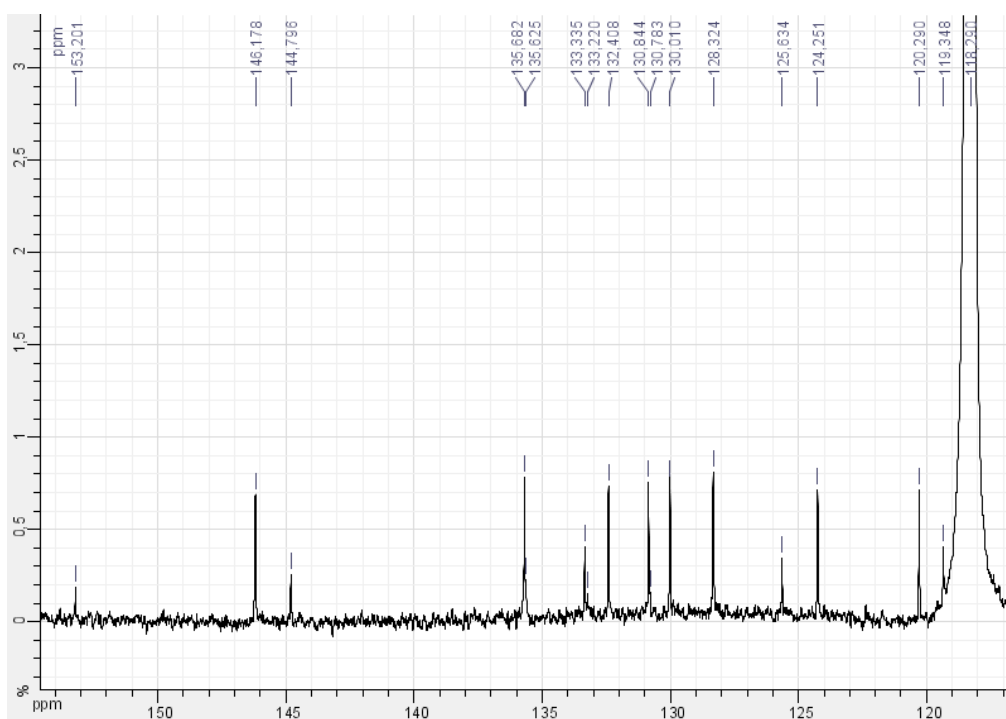

Figure S5.  $^{13}\text{C}$  NMR spectrum of **2** in acetonitrile.

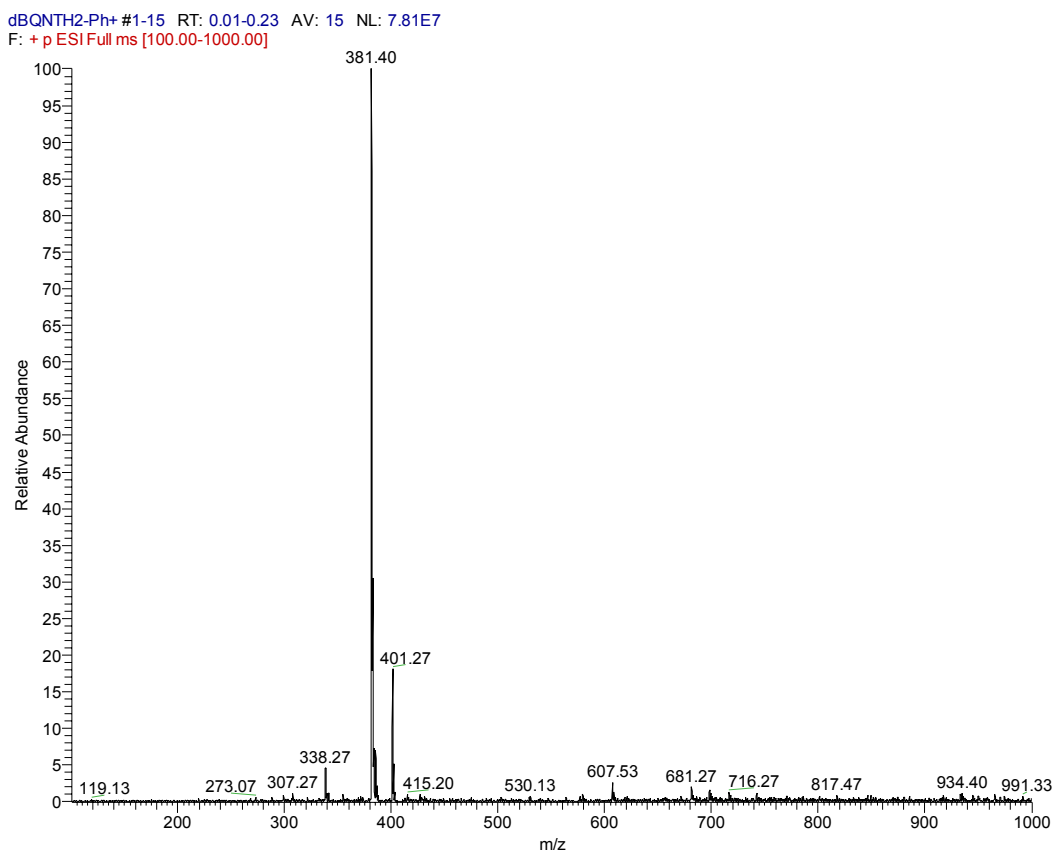

**Figure S6.** Mass spectrum of **2**.

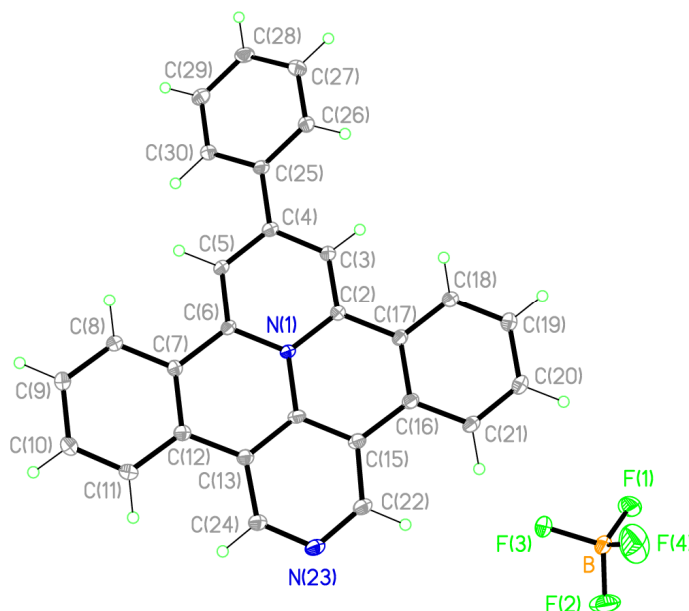

**Figure S7.** X-ray structure of **2** : ORTEP drawing with thermal ellipsoids (40% probability). For further details, CCDC-743209 contains the supplementary crystallographic data. These latter data can be obtained free of charge from The Cambridge Crystallographic Data Centre via [www.ccdc.cam.ac.uk/data\\_request/cif](http://www.ccdc.cam.ac.uk/data_request/cif).

## **Materials and Methods**

Absorption spectra have been obtained by a JASCO 560 and a Cintra 20 GBC spectrophotometers. Luminescence spectra have been recorded with a Horiba Jobin-Yvon Spex Fluoromax P fluorimeter equipped with a Hamamatsu R928 photomultiplier. Luminescence lifetimes have been obtained by an Edinburgh OB900 time-correlated single-photon-counting spectrometer (excitation pulse obtained by a laser diode at 308 nm; pulse width, 59 ps) and analyzed by Marquadt algorithm and deconvolution procedures supplied by the manufacturer. Luminescence quantum yields have been calculated with the optically diluted method<sup>1</sup> and photoreaction quantum yields have been calculated by using Aberchrome 540 as the standard.<sup>2</sup> Circular dichroism experiments have been performed by a Jasco J-810 spectropolarimeter. The thermal denaturation temperature of compound–DNA mixtures (1:10) has been determined in  $1 \times 10^{-3}$  M phosphate buffer (pH 7) containing  $7.8 \times 10^{-6}$  M compound and  $2 \times 10^{-3}$  M NaCl. Melting curves have been recorded at 260 nm. The temperature has been increased at a rate of 0.5 K/min by using a PTP-1 Peltier system. For the photochemical reaction, we used a Xenon lamp (150 W) as excitation source. The excitation wavelength was selected by employing a monochromator.

Viscosity titrations have been performed by means of a Cannon-Ubbelohde semi-micro-dilution viscometer (Series No. 75, Cannon Instrument Co.), thermostatically maintained at 298 K in a water bath. The viscometer contained 2 mL of sonicated DNA solution, in  $1 \times 10^{-3}$  M phosphate buffer (pH = 7) and  $1 \times 10^{-2}$  M NaCl. The compound solution ( $(1.5\text{--}2.5) \times 10^{-4}$  M), containing also DNA ( $6.0 \times 10^{-4}$  M) at the same concentration as that in the viscometer, has been delivered in increments of 90–190  $\mu$ L from a micropipette. Reduced viscosities have been calculated by established methods and plotted as  $\ln \eta/\eta_0$  against  $\ln(1+r)$  for rod-like DNA (600 base pairs) ( $\eta$  = reduced viscosity of the biopolymer solution in the presence of compound;  $\eta_0$  = reduced viscosity of the biopolymer solution in the absence of compound;  $r = [\text{compound}]_{\text{bound}}/[\text{biopolymer}]_{\text{tot}}$ ). For the viscometric titrations, in the case of irradiated **1** the amount of bound compound has been assumed to be equivalent to the amount of **1** in solution before irradiation. This is based on the quantitative photoinduced transformation of **1** into **2**. The same is assumed also for all the experiments when the concentration of irradiated **1** has to be considered.

The data of the spectrophotometric titrations have been analyzed by a nonlinear least-squares fitting program, applied to McGhee and von Hippel equation.<sup>3</sup> The binding constant,  $K_B$ , has been determined by the program, using the extinction coefficient of the compounds, the free compound concentration and the ratio of bound compound per mole of DNA.

### **Schematization of the photochemical biscyclization reaction**

The photochemical reaction is schematized in equation 1.

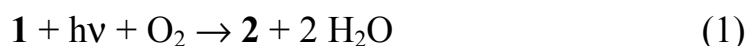

### **Circular dichroism**

Generally, an achiral species acquires an induced CD signal only if it specifically binds a chiral molecule, like DNA. For our compounds, only compound **2** shows CD signals in the presence of excess DNA in the region where the compound-DNA supramolecular assembly absorbs. Circular dichroism spectra of the mixture  $[\text{DNA}]/[\text{compound}] = 3$  are shown in Fig. S8.

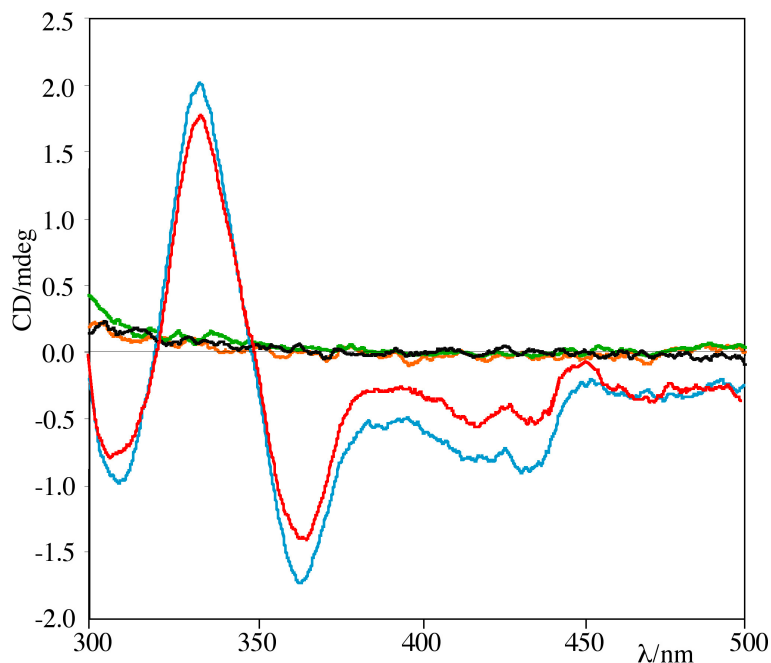

**Figure S8.** Circular dichroism spectra in buffered solution. The spectra of **1** (black), **2** (orange), and **1** in the presence of three-fold excess of DNA (green) are overlapped at CD signal around 0 mdeg. Light blue curve is **2** in the presence of DNA. Red curve is **1** in the presence of DNA after irradiation (30 min at 320 nm). Ionic strength:  $1.1 \times 10^{-2} \text{ M}$  ( $[\text{NaCl}] = 1.0 \times 10^{-2} \text{ M}$ ;  $[\text{phosphate buffer}]_{\text{pH}=7} = 1.0 \times 10^{-3} \text{ M}$ );  $T = 298 \text{ K}$ . Concentration of **1** or **2** is  $2.7 \times 10^{-5} \text{ M}$ .

### **Comparison between absorption spectra of 2 and irradiated 1 in the presence of DNA**

Figure S9 shows a comparison between the absorption spectra of **2** and irradiated **1** in the presence of DNA. It can be noted that the spectra are practically identical. As **2** intercalates between base pairs (see main text and Fig. 1 in the paper), this experiment indicates that irradiated **1** behaves as **2**, as expected, and that the photoreaction is essentially quantitative, also in the presence of DNA.

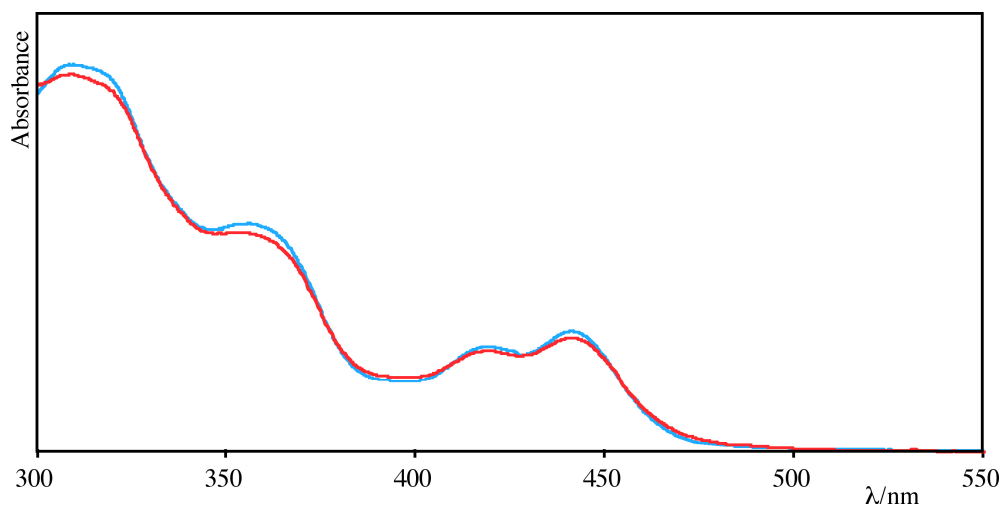

**Figure S9.** Absorption spectra of **2** in the presence of DNA (blue line) and of irradiated **1** in the presence of a three-fold excess of DNA (red line). Ionic strength:  $1.1 \times 10^{-2}$  M ( $[\text{NaCl}] = 1.0 \times 10^{-2}$  M;  $[\text{phosphate buffer}]_{\text{pH}=7} = 1.0 \times 10^{-3}$  M);  $T = 298$  K. Concentration of **1** or **2** is  $2.7 \times 10^{-5}$  M.

### **References:**

1. G. A. Crosby and J. N. Demas, *Phys. Chem.*, 1971, **75**, 991–1024.
2. Handbook of Photochemistry - Third Edition (Eds.: M. Montalti, A. Credi, L. Prodi and M. T. Gandolfi, CRC, Boca Raton, FL, 2006).
3. J. D. McGhee and P. H. von Hippel, *J. Mol. Biol.*, 1974, **86**, 469-489.
